# Supplementary material
Source: publisher figshare collection journal article supplement (https://acs.figshare.com/ndownloader/files/22271586)

# **RuO<sub>2</sub> Nanorods on Electrospun Carbon Nanofibers for Supercapacitors**

Sohyun Jeon<sup>†, §</sup>, Ji Hwan Jeong<sup>‡, §</sup>, Hyomin Yoo<sup>†</sup>, Hak Ki Yu<sup>||</sup>, Bo-Hye Kim<sup>‡\*</sup>,  
and Myung Hwa Kim<sup>†\*</sup>

*<sup>†</sup>Department of Chemistry & Nanoscience, Ewha Womans University, Seoul, 13760, Korea*

*<sup>‡</sup>Department of Science Education, Chemistry Education Major, Daegu University, 201 Daegudaero-ro, Gyeongsan-si, Gyeongsangbuk-do, 712-714, Korea*

*<sup>||</sup>Department of Materials Science and Engineering & Dept. of Energy Systems Research, Ajou University, Suwon, 16499, Korea*

*§: Both authors contributed equally to this work.*

*\*Corresponding author*

*E-mail addresses: [myungkim@ewha.ac.kr](mailto:myungkim@ewha.ac.kr) (M.H. Kim), [bohye@daegu.ac.kr](mailto:bohye@daegu.ac.kr) (B.-H. Kim)*

**Figure S1.** The average diameter of the pure CNF as a function of annealing time at 180°C.(N=50)

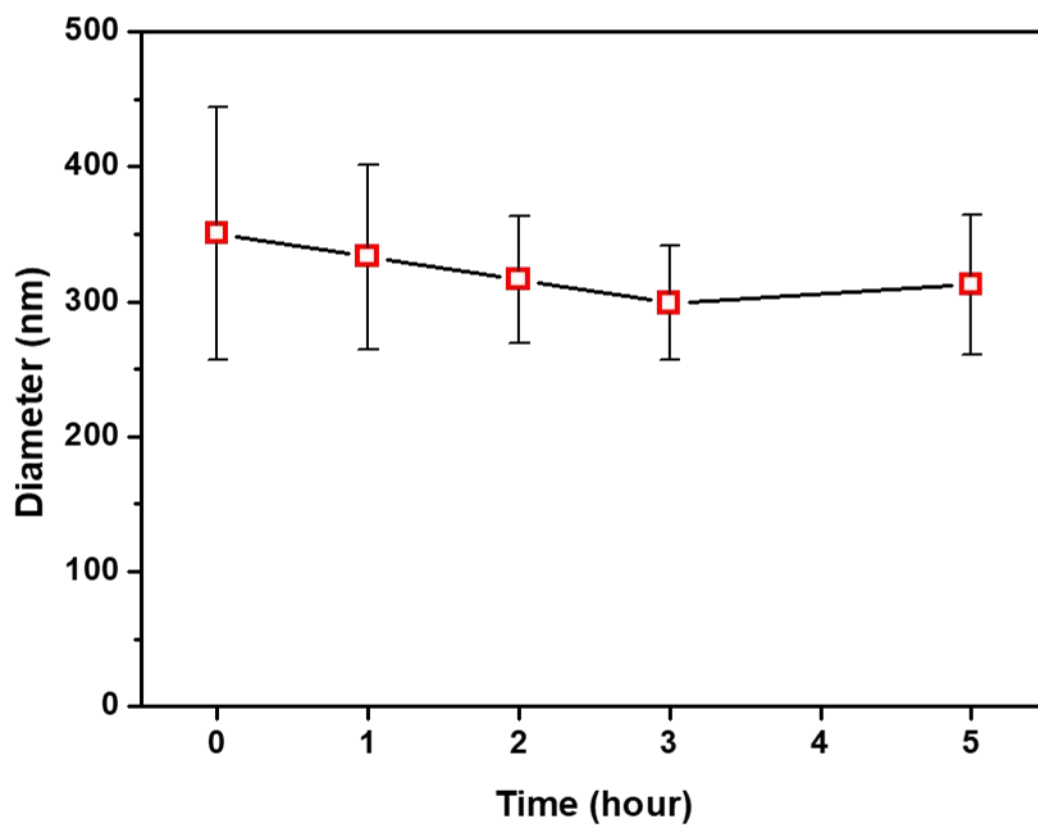

**Figure S2.** The optical photographs and contact angle measurement images of (a) CNF and (b)  $\text{RuO}_2\text{-CNF}(220)$ .

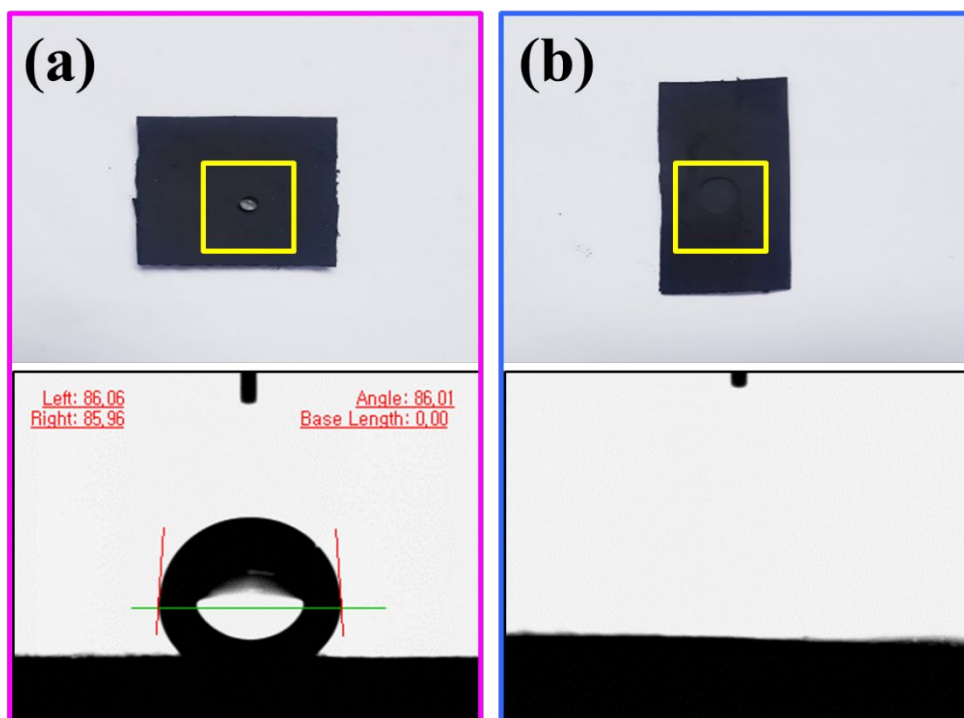

**Figure S3.** Total specific capacitance ( $C_{sp}$ ) at current density of 3 mAcm<sup>-2</sup> and specific capacitance of RuO<sub>2</sub> component ( $C_{sp}^{Ru}$ ).

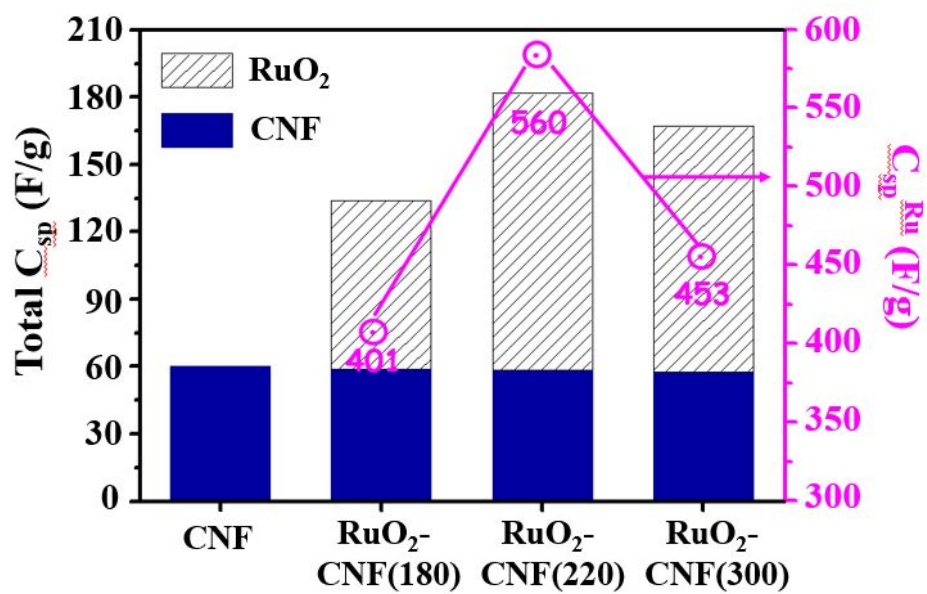

Supplement: Supplementary file 1 [file 22271586]
